# Supplementary material for: Natural selection of a GSK3 determines rice mesocotyl domestication by coordinating strigolactone and brassinosteroid signaling
Source: PubMed Central journal article supplement (PMC6023860; doi:10.1038/s41467-018-04952-9), 2018-06-28
Supplement: 41467_2018_4952_MOESM2_ESM.pdf [file 41467_2018_4952_MOESM2_ESM.pdf]

**Descriptions of Additional Supplementary Files:**

File Name: Supplementary Dataset 1

Description: List of 510 rice accessions used for association analysis.

File Name: Supplementary Dataset 2

Description: List of the rice accessions used for OsGSK2 transcription analysis.

File Name: Supplementary Dataset 3

Description: The sequences of all primers used in this study.
